# Supplementary material for: Effect of Lavage Solution Type on Bronchoalveolar Lavage Fluid Cytology in Clinically Healthy Horses
Source: MDPI journal article supplement (doi:10.3390/ani13162637), 2023-08-15
Supplement: s1 [file s1]

## SUPPLEMENT

all data

| Fluid  | Horse | Lung<br>lobe | TNC* | TNC*   | %N  | %N     | %M  | %M     |
|--------|-------|--------------|------|--------|-----|--------|-----|--------|
|        |       |              | T=0  | T=48hr | T=0 | T=48hr | T=0 | T=48hr |
| Saline | 1     | RAcL         | 274  | 803    | .3  | 58.1   | 6.5 | 1.0    |
| Saline | 1     | RCaL         | 415  | 478    | .3  | 25.8   | 1.5 | .6     |
| Saline | 1     | LCaL         | 731  | 376    | 1.2 | 4.9    | 2.5 | 1.7    |
| Saline | 1     | LCrL         | 340  | 282    | .7  | 3.5    | 2.4 | 1.7    |
| Saline | 2     | RAcL         | 474  | 781    | .7  | 23.5   | 7.6 | 4.2    |
| Saline | 2     | RCaL         | 496  | 626    | 1.4 | 27.3   | 6.4 | 1.7    |
| Saline | 2     | LCaL         | 389  | 525    | .5  | 9.9    | 1.3 | 2.2    |
| Saline | 2     | LCrL         | 409  | 595    | 1.7 | 2.8    | 6.4 | 3.6    |
| Saline | 3     | RAcL         | 828  | 515    | 1.4 | 6.4    | 1.2 | 1.3    |
| Saline | 3     | RCaL         | 275  | 368    | .5  | 12.3   | 1.0 | .2     |
| Saline | 3     | LCaL         | 594  | 1073   | 1.7 | 21.0   | 2.7 | 3.6    |
| Saline | 3     | LCrL         | 597  | 488    | 1.3 | 9.5    | .9  | 1.0    |
| Saline | 4     | RAcL         | 395  | 372    | .8  | 12.9   | 1.4 | 2.0    |
| Saline | 4     | RCaL         | 479  | 873    | 3.3 | 12.3   | 1.0 | .9     |
| Saline | 4     | LCaL         | 413  | 433    | 1.8 | 11.4   | 3.1 | .3     |
| Saline | 4     | LCrL         | 381  | 684    | 1.3 | 16.2   | 7.2 | 3.4    |

|               |   |      |     |      |     |      |     |     |
|---------------|---|------|-----|------|-----|------|-----|-----|
| <b>Ringer</b> | 1 | RAcL | 506 | 496  | .0  | 17.0 | 3.0 | 1.1 |
| <b>Ringer</b> | 1 | RCaL | 537 | 734  | 1.1 | 36.6 | 3.4 | 1.5 |
| <b>Ringer</b> | 1 | LCaL | 562 | 454  | .9  | 5.5  | 2.9 | 1.3 |
| <b>Ringer</b> | 1 | LCrL | 337 | 472  | 1.4 | 5.8  | 2.0 | 1.6 |
| <b>Ringer</b> | 2 | RAcL | 379 | 554  | 3.6 | 13.1 | 6.0 | 4.1 |
| <b>Ringer</b> | 2 | RCaL | 476 | 519  | 3.2 | 25.5 | 1.2 | 1.5 |
| <b>Ringer</b> | 2 | LCaL | 593 | 1028 | 1.9 | 33.3 | 8.0 | 2.8 |
| <b>Ringer</b> | 2 | LCrL | 426 | 587  | 1.2 | 9.0  | 4.0 | 2.6 |
| <b>Ringer</b> | 3 | RAcL | 497 | 602  | 1.1 | 1.5  | 1.1 | .7  |
| <b>Ringer</b> | 3 | RCaL | 540 | 498  | 1.5 | 12.2 | .9  | 1.1 |
| <b>Ringer</b> | 3 | LCaL | 712 | 396  | 1.8 | 14.3 | 1.1 | 1.1 |
| <b>Ringer</b> | 3 | LCrL | 809 | 64   | 1.1 | 28.7 | 5.3 | 1.4 |
| <b>Ringer</b> | 4 | RAcL | 737 | 563  | .3  | 2.1  | 6.4 | 4.2 |
| <b>Ringer</b> | 4 | RCaL | 410 | 464  | 1.2 | 12.0 | 1.5 | .6  |
| <b>Ringer</b> | 4 | LCaL | 407 | 767  | 3.0 | 4.2  | 1.7 | 3.0 |
| <b>Ringer</b> | 4 | LCrL | 320 | 361  | 1.9 | 1.4  | 2.9 | 1.8 |
| <b>PBS</b>    | 1 | RAcL | 319 | 456  | 4.3 | 11.0 | 3.1 | 2.1 |
| <b>PBS</b>    | 1 | RCaL | 610 | 375  | .8  | 12.4 | 1.4 | 1.6 |
| <b>PBS</b>    | 1 | LCaL | 389 | 453  | 2.1 | 25.2 | 2.3 | 1.3 |
| <b>PBS</b>    | 1 | LCrL | 368 | 365  | .6  | 7.5  | 2.3 | 2.8 |

|                   |   |      |     |     |     |      |      |     |
|-------------------|---|------|-----|-----|-----|------|------|-----|
| <b>PBS</b>        | 2 | RAcL | 291 | 581 | 1.1 | 8.1  | 4.4  | 4.4 |
| <b>PBS</b>        | 2 | RCaL | 332 | 534 | 2.3 | 13.3 | 3.4  | 3.2 |
| <b>PBS</b>        | 2 | LCaL | 295 | 323 | 2.4 | 2.6  | 3.5  | 1.9 |
| <b>PBS</b>        | 2 | LCrL | 421 | 734 | 2.4 | 38.9 | 4.3  | 3.2 |
| <b>PBS</b>        | 3 | RAcL | 485 | 436 | 1.5 | 12.1 | 2.7  | 2.3 |
| <b>PBS</b>        | 3 | RCaL | 434 | 514 | .6  | 12.2 | 1.0  | 1.1 |
| <b>PBS</b>        | 3 | LCaL | 644 | 580 | 1.4 | 8.8  | 1.1  | .7  |
| <b>PBS</b>        | 3 | LCrL | 496 | 392 | 2.1 | 18.2 | 1.3  | 1.2 |
| <b>PBS</b>        | 4 | RAcL | 509 | 709 | 2.0 | 2.6  | 3.7  | 4.4 |
| <b>PBS</b>        | 4 | RCaL | 477 | 398 | 1.7 | 19.9 | 4.0  | 2.8 |
| <b>PBS</b>        | 4 | LCaL | 481 | 422 | 2.4 | 7.1  | .9   | 2.8 |
| <b>PBS</b>        | 4 | LCrL | 402 | 421 | 2.3 | 6.3  | 1.6  | 3.1 |
| <b>Plasmalyte</b> | 1 | RAcL | 284 | 339 | 1.0 | 15.9 | 3.4  | 2.7 |
| <b>Plasmalyte</b> | 1 | RCaL | 285 | 218 | .7  | 7.6  | 2.0  | 3.0 |
| <b>Plasmalyte</b> | 1 | LCaL | 450 | 496 | .9  | 9.9  | 2.1  | 2.1 |
| <b>Plasmalyte</b> | 1 | LCrL | 339 | 219 | .7  | 18.6 | 9.0  | 3.1 |
| <b>Plasmalyte</b> | 2 | RAcL | 205 | 588 | 1.0 | 21.3 | 13.3 | 5.6 |
| <b>Plasmalyte</b> | 2 | RCaL | 140 | 270 | 3.2 | 2.8  | 2.8  | 3.7 |
| <b>Plasmalyte</b> | 2 | LCaL | 227 | 339 | 3.2 | 1.2  | 7.6  | 5.7 |
| <b>Plasmalyte</b> | 2 | LCrL | 228 | 313 | 2.1 | 11.0 | 4.4  | 3.8 |

|                   |   |      |     |     |     |      |     |     |
|-------------------|---|------|-----|-----|-----|------|-----|-----|
| <b>Plasmalyte</b> | 3 | RAcL | 540 | 385 | .3  | 13.2 | .0  | .3  |
| <b>Plasmalyte</b> | 3 | RCaL | 446 | 296 | 1.2 | 18.3 | 6.3 | 4.2 |
| <b>Plasmalyte</b> | 3 | LCaL | 291 | 225 | 1.2 | 1.5  | 3.2 | 3.7 |
| <b>Plasmalyte</b> | 3 | LCrL | 374 | 330 | 1.8 | 7.2  | 1.3 | 1.3 |
| <b>Plasmalyte</b> | 4 | RAcL | 266 | 333 | 2.9 | 4.7  | 1.3 | 3.2 |
| <b>Plasmalyte</b> | 4 | RCaL | 308 | 408 | 1.1 | 11.2 | 3.0 | 1.2 |
| <b>Plasmalyte</b> | 4 | LCaL | 865 | 330 | 1.8 | 6.6  | 5.2 | 4.8 |
| <b>Plasmalyte</b> | 4 | LCrL | 290 | 296 | 1.9 | 9.2  | 2.2 | 4.3 |

\*TNC Total nucleated cell counts (nx10<sup>6</sup>)

%N Neutrophil percentage

RAcL Right accessory lobe

RCaL Right caudodorsal lobe

LCaL Left caudodorsal lobe

LCrL Left cranial lobe

PBS Phosphate buffered saline

TNC Total nucleated cell counts
